# Supplementary material for: Competition between virus-derived and endogenous small RNAs regulates gene expression inCaenorhabditis elegans
Source: HighWire-hosted journal article supplement (doi:10.1101/gr.153296.112), 2013-06-28
Supplement: Supplemental_Table_Legends.docx [file Supplemental_Table_Legends.docx]

**Supplemental table 1**

Genes statistically significantly altered upon viral infection. Data shows the expression change for each replicate infection, relative to the mean from uninfected animals of the same strain. The public name was taken from Wormbase.

**Supplemental table 2**

RDE-1 regulated genes. Probes that are >30% upregulated in *rde-1* mutants (p<0.05) are shown. Corresponding Wormbase gene ids are shown.

**Supplemental table 3**

Genes with RDE-1 dependent antisense small RNA reads.

**Supplemental table 4**

Virus-specific genes: not upregulated in JU1580.

**Supplemental table 5**

Primers for qPCR validation; Primers for analysis of deletions in JU1580.
